# Supplementary material
Source: PubMed Central journal article supplement (PMC522017)

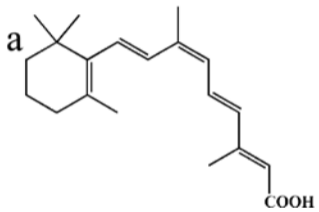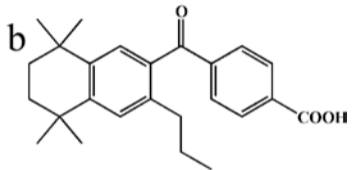

Supplement: pnas_101_41_14707__1.pdf [file pnas_101_41_14707__1.pdf]

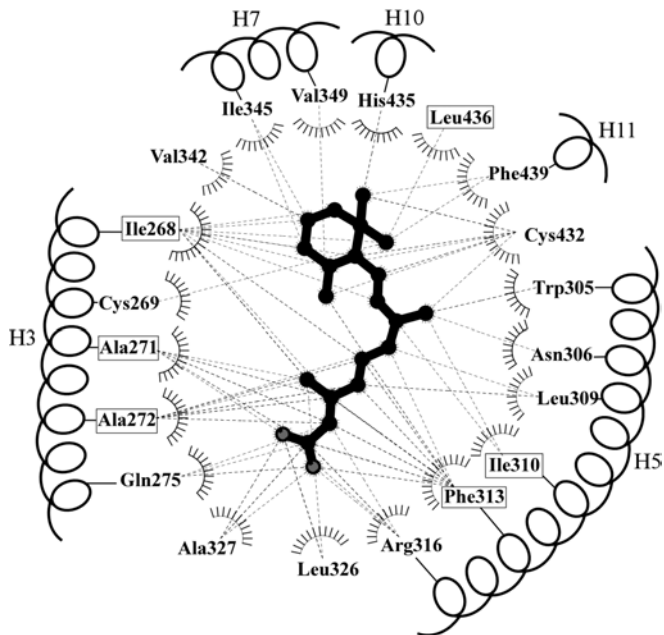

Supplement: pnas_101_41_14707__2.pdf [file pnas_101_41_14707__2.pdf]

a

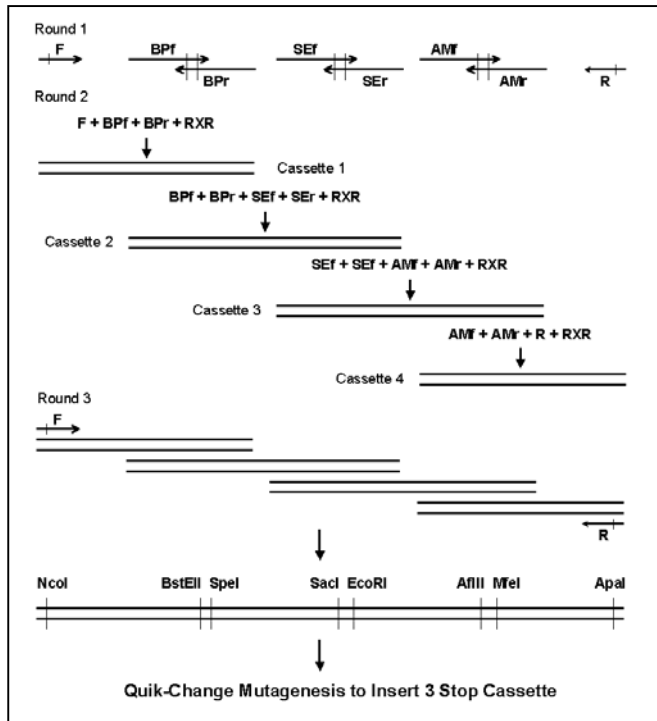

b

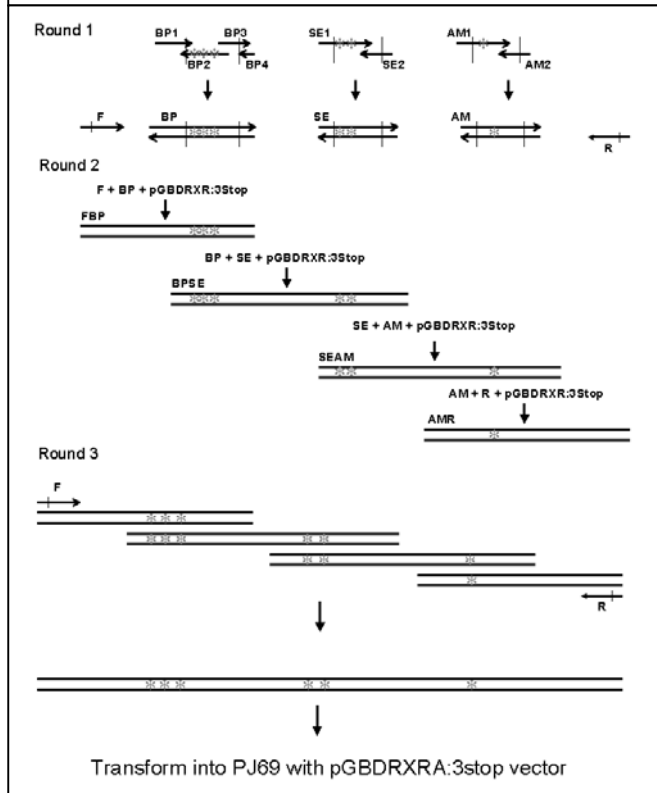

Supplement: pnas_101_41_14707__4.pdf [file pnas_101_41_14707__4.pdf]
